# Supplementary material for: Fighting Antibiotic Resistance: New Pyrimidine-Clubbed Benzimidazole Derivatives as Potential DHFR Inhibitors
Source: MDPI journal article supplement (doi:10.3390/molecules28020501), 2023-01-04
Supplement: s1 [file s1]

# Fighting antibiotic resistance: New pyrimidine-clubbed benzimidazole derivatives as potential DHFR inhibitors

M. Akiful Haque<sup>1</sup>, Akash Marathakam<sup>2</sup>, Ritesh Rana<sup>3</sup>, Samar J Almeahmadi<sup>4</sup>, Vishal B. Tambe<sup>5</sup>, Manoj Charde<sup>6</sup>, Fahadul Islam<sup>7</sup>, Falak A. Siddiqui<sup>8</sup>, Giulia Culletta<sup>9</sup>, Anna Maria Almerico<sup>9</sup>, Marco Tutone<sup>9\*</sup>, Sharuk L. Khan<sup>8\*</sup>

<sup>1</sup> Department of Pharmaceutical Analysis, School of Pharmacy, Anurag University, Ghatkesar, Hyderabad, India-500088; [akif963@gmail.com](mailto:akif963@gmail.com) (M.A.H)

<sup>2</sup> National College of Pharmacy, Kozhikode, Kerala-673602, India; [amarathakam@gmail.com](mailto:amarathakam@gmail.com) (A.M)

<sup>3</sup> Department of Pharmaceutics, Himachal Institute of Pharmaceutical Education and Research (HIPER), Bela, Nadaun, Hamirpur, Himachal Pradesh, 177042, India; [riteshpharma1719@gmail.com](mailto:riteshpharma1719@gmail.com) (R.R)

<sup>4</sup> Department of Chemistry, Faculty of Applied Science, Umm-Al-Qura University, Makkah, Saudi Arabia; [sgmeahmadi@uqu.edu.sa](mailto:sgmeahmadi@uqu.edu.sa) (S.J.A)

<sup>5</sup> Department of Pharmaceutical Chemistry, Pravara Rural College of Pharmacy, Loni, Maharashtra 413736, India; Email: [vishaltambe55@gmail.com](mailto:vishaltambe55@gmail.com) (V.B.T)

<sup>6</sup> Department of Pharmaceutical Chemistry, Government College of Pharmacy, Karad, Maharashtra 415124, India; Email: [manojudps@rediffmail.com](mailto:manojudps@rediffmail.com) (M.C)

<sup>7</sup> Department of Pharmacy, Faculty of Allied Health Sciences, Daffodil International University, Dhaka 1207, Bangladesh; Email: [fahadulislamdiu@gmail.com](mailto:fahadulislamdiu@gmail.com) (F.I)

<sup>8</sup> Department of Pharmaceutical Chemistry, N.B.S. Institute of Pharmacy, Ausa 413520, Maharashtra, India; [sharique.4u4@gmail.com](mailto:sharique.4u4@gmail.com) (S.L.K); [falakarjumand26@gmail.com](mailto:falakarjumand26@gmail.com) (F.A.S)

<sup>9</sup> Dipartimento di Scienze e Tecnologie Biologiche Chimiche e Farmaceutiche, Università degli Studi di Palermo, 90123 Palermo, Italy; Email: [culletta.giulia@gmail.com](mailto:culletta.giulia@gmail.com) (G.C.); [annamaria.almerico@unipa.it](mailto:annamaria.almerico@unipa.it) (A.M.A); [marco.tutone@unipa.it](mailto:marco.tutone@unipa.it) (M.T.)

\* Correspondence: [sharique.4u4@gmail.com](mailto:sharique.4u4@gmail.com) (S.L.K); [marco.tutone@unipa.it](mailto:marco.tutone@unipa.it) (M.T.)

Table S1. The molecular interactions of designed derivatives with DHFR

Figure S1. Mass Spectrum of Synthesized Compound 27

Figure S2. Mass Spectrum of Synthesized Compound 29

Figure S3. Mass Spectrum of Synthesized Compound 30

Figure S4. Mass Spectrum of Synthesized Compound 33

Figure S5. Mass Spectrum of Synthesized Compound 37

Figure S6. Mass Spectrum of Synthesized Compound 38

Figure S7. Mass Spectrum of Synthesized Compound 41

**Table S1. The molecular interactions of designed derivatives with DHFR**

| Active amino acid | Bond length | Bond type     | Bond Category              | Binding energy | Docking score |
|-------------------|-------------|---------------|----------------------------|----------------|---------------|
| Native ligand     |             |               |                            |                |               |
| ASP27             | 1.88237     | Hydrogen bond | Conventional hydrogen bond | 209.71         | -8.5          |
| ASP27             | 2.19462     |               |                            |                |               |
| ALA6              | 3.00495     |               |                            |                |               |
| ILE5              | 1.91594     |               |                            |                |               |
| ARG57             | 1.96549     |               |                            |                |               |
| ARG57             | 2.17225     |               |                            |                |               |
| ILE94             | 3.19208     | Hydrophobic   | Carbon hydrogen bond       |                |               |
| ILE50             | 3.71343     |               | Pi-Sigma                   |                |               |
| PHE31             | 5.0747      |               | Pi-Pi T-shaped             |                |               |
| PHE31             | 4.82737     |               |                            |                |               |
| ILE94             | 4.98884     |               | Alkyl                      |                |               |
| ILE5              | 5.06209     |               | Pi-Alkyl                   |                |               |
| ALA7              | 4.05078     |               |                            |                |               |
| 25                |             |               |                            |                |               |
| GLY15             | 3.55047     | Hydrogen Bond | Carbon Hydrogen Bond       | 470.6          | -7.2          |
| ALA7              | 3.53102     |               |                            |                |               |
| GLY15             | 3.56798     |               |                            |                |               |
| GLY95             | 3.56301     |               |                            |                |               |
| GLY96             | 3.62775     |               |                            |                |               |
| LEU28             | 3.69758     | Hydrophobic   | Pi-Sigma                   |                |               |
| ILE50             | 5.308       |               | Alkyl                      |                |               |
| LEU28             | 4.67657     |               |                            |                |               |
| MET20             | 4.73921     |               | Pi-Alkyl                   |                |               |
| LEU28             | 5.28802     |               |                            |                |               |
| MET20             | 5.1395      |               |                            |                |               |
| 26                |             |               |                            |                |               |
| ALA7              | 3.49842     | Hydrogen Bond | Carbon Hydrogen Bond       | 587.12         | -8.5          |
| LEU28             | 3.93756     | Hydrophobic   | Pi-Sigma                   |                |               |
| LEU28             | 3.78875     |               |                            |                |               |
| PHE31             | 4.56793     |               | Pi-Pi T-shaped             |                |               |
| ILE50             | 5.31688     |               | Alkyl                      |                |               |
| LEU28             | 4.80815     |               |                            |                |               |
| MET20             | 4.84878     |               | Pi-Alkyl                   |                |               |
| LEU28             | 5.18977     |               |                            |                |               |
| MET20             | 5.32265     |               |                            |                |               |

|       |         |               |                         |        |      |
|-------|---------|---------------|-------------------------|--------|------|
| ILE5  | 5.29874 |               |                         |        |      |
| ALA7  | 4.42874 |               |                         |        |      |
| 27    |         |               |                         |        |      |
| LEU28 | 3.96052 | Hydrophobic   | Pi-Sigma                | 588.4  | -8.6 |
| LYS32 | 3.58775 |               | Alkyl                   |        |      |
| LEU28 | 4.33004 |               | Pi-Alkyl                |        |      |
| ALA7  | 4.25134 |               |                         |        |      |
| PHE31 | 4.87554 |               |                         |        |      |
| 28    |         |               |                         |        |      |
| GLY15 | 3.73566 | Hydrogen Bond | Carbon<br>Hydrogen Bond | 588.98 | -8.4 |
| ASP27 | 3.17092 | Halogen       | Halogen<br>(Fluorine)   |        |      |
| ASP27 | 3.60693 |               |                         |        |      |
| ASP27 | 3.87889 | Electrostatic | Pi-Anion                |        |      |
| LEU28 | 3.76687 | Hydrophobic   | Pi-Sigma                |        |      |
| LEU28 | 3.97034 |               |                         |        |      |
| LYS32 | 3.61835 |               | Alkyl                   |        |      |
| ALA7  | 4.24717 |               | Pi-Alkyl                |        |      |
| PHE31 | 4.82023 |               |                         |        |      |
| 29    |         |               |                         |        |      |
| ALA7  | 3.46744 | Hydrogen Bond | Carbon<br>Hydrogen Bond | 589.31 | -9.3 |
| LEU28 | 3.93237 | Hydrophobic   | Pi-Sigma                |        |      |
| LEU28 | 3.75872 |               |                         |        |      |
| PHE31 | 4.58907 |               | Pi-Pi T-shaped          |        |      |
| ILE50 | 5.22086 |               | Alkyl                   |        |      |
| LEU28 | 4.7552  |               |                         |        |      |
| ILE5  | 4.57366 |               |                         |        |      |
| ALA7  | 4.25461 |               |                         |        |      |
| MET20 | 4.94999 |               | Pi-Alkyl                |        |      |
| LEU28 | 5.15219 |               |                         |        |      |
| MET20 | 5.31113 |               |                         |        |      |
| ILE5  | 5.26508 |               |                         |        |      |
| ALA7  | 4.46628 |               |                         |        |      |
| TRP30 | 5.07411 |               |                         |        |      |
| 30    |         |               |                         |        |      |
| ALA7  | 3.54199 | Hydrogen Bond | Carbon<br>Hydrogen Bond | 589.91 | -9.6 |
| LEU28 | 3.97283 | Hydrophobic   | Pi-Sigma                |        |      |
| LEU28 | 3.8096  |               |                         |        |      |
| PHE31 | 4.51892 |               | Pi-Pi T-shaped          |        |      |
| ILE50 | 5.22229 |               | Alkyl                   |        |      |

|           |         |               |                            |        |      |
|-----------|---------|---------------|----------------------------|--------|------|
| LEU28     | 4.75714 |               |                            |        |      |
| ILE5      | 4.54982 |               |                            |        |      |
| ALA7      | 4.2748  |               |                            |        |      |
| MET20     | 4.92106 |               | Pi-Alkyl                   |        |      |
| LEU28     | 5.19863 |               |                            |        |      |
| MET20     | 5.29169 |               |                            |        |      |
| ILE5      | 5.24046 |               |                            |        |      |
| ALA7      | 4.50596 |               |                            |        |      |
| TRP30     | 5.21682 |               |                            |        |      |
| <b>31</b> |         |               |                            |        |      |
| PRO21     | 3.05404 | Hydrogen Bond | Conventional Hydrogen Bond | 520.64 | -8.2 |
| TRP22     | 2.07363 |               |                            |        |      |
| ASN23     | 2.52579 |               |                            |        |      |
| GLU17     | 2.67449 |               |                            |        |      |
| GLU17     | 2.78723 |               |                            |        |      |
| GLY15     | 3.65443 |               | Carbon Hydrogen Bond       |        |      |
| MET20     | 5.37113 | Hydrophobic   | Alkyl                      |        |      |
| ILE5      | 4.2758  |               |                            |        |      |
| ALA7      | 4.27882 |               |                            |        |      |
| ALA7      | 4.89267 |               | Pi-Alkyl                   |        |      |
| PHE31     | 4.98391 |               |                            |        |      |
| <b>32</b> |         |               |                            |        |      |
| ASP27     | 2.57625 | Hydrogen Bond | Conventional Hydrogen Bond | 588.87 | -8.3 |
| ASP27     | 3.95287 | Electrostatic | Pi-Anion                   |        |      |
| LEU28     | 3.98413 | Hydrophobic   | Pi-Sigma                   |        |      |
| LYS32     | 3.6357  |               | Alkyl                      |        |      |
| LEU28     | 4.3027  |               | Pi-Alkyl                   |        |      |
| ALA7      | 4.30063 |               |                            |        |      |
| PHE31     | 4.80426 |               |                            |        |      |
| <b>33</b> |         |               |                            |        |      |
| MET20     | 3.0518  | Hydrogen Bond | Conventional Hydrogen Bond | 826.79 | -9   |
| ILE94     | 2.68072 |               |                            |        |      |
| ASP27     | 3.72887 |               | Carbon Hydrogen Bond       |        |      |
| MET20     | 3.78307 | Hydrophobic   | Pi-Sigma                   |        |      |
| PHE31     | 5.67997 |               | Pi-Pi T-shaped             |        |      |
| PHE31     | 5.73244 |               |                            |        |      |
| ILE50     | 4.96304 |               | Alkyl                      |        |      |
| LYS32     | 3.95492 |               |                            |        |      |
| LEU54     | 4.99074 |               |                            |        |      |

|           |         |               |                            |        |      |  |
|-----------|---------|---------------|----------------------------|--------|------|--|
| LEU28     | 5.28126 | Pi-Alkyl      |                            |        |      |  |
| ILE50     | 4.93483 |               |                            |        |      |  |
| LEU28     | 4.63308 |               |                            |        |      |  |
| ILE14     | 5.34255 |               |                            |        |      |  |
| PHE31     | 4.91521 |               |                            |        |      |  |
| 34        |         |               |                            |        |      |  |
| ILE94     | 2.86179 | Hydrogen Bond | Conventional Hydrogen Bond | 518.55 | -8   |  |
| TRP22     | 1.9705  |               |                            |        |      |  |
| TRP22     | 2.35691 |               |                            |        |      |  |
| MET20     | 4.3483  | Other         | Pi-Sulfur                  |        |      |  |
| PHE31     | 4.86059 | Hydrophobic   | Pi-Pi T-shaped             |        |      |  |
| ALA6:ALA7 | 4.36561 |               | Amide-Pi Stacked           |        |      |  |
| MET20     | 5.22922 |               | Alkyl                      |        |      |  |
| ILE5      | 4.79331 |               |                            |        |      |  |
| ALA7      | 3.97847 |               |                            |        |      |  |
| ALA7      | 5.28805 |               | Pi-Alkyl                   |        |      |  |
| MET20     | 5.45896 |               |                            |        |      |  |
| ILE5      | 5.34592 |               |                            |        |      |  |
| ALA7      | 4.54534 |               |                            |        |      |  |
| 35        |         |               |                            |        |      |  |
| GLU17     | 5.23367 | Electrostatic | Attractive Charge          | 650.26 | -8.2 |  |
| ILE94     | 2.49803 | Hydrogen Bond | Conventional Hydrogen Bond |        |      |  |
| ALA7      | 3.05679 |               |                            |        |      |  |
| LEU28     | 3.83897 | Hydrophobic   | Pi-Sigma                   |        |      |  |
| LEU28     | 3.72044 |               | Alkyl                      |        |      |  |
| PRO25     | 4.0166  |               |                            |        |      |  |
| ILE5      | 4.55375 |               |                            |        |      |  |
| ALA7      | 4.09288 |               | Pi-Alkyl                   |        |      |  |
| PHE31     | 4.97521 |               |                            |        |      |  |
| 36        |         |               |                            |        |      |  |
| ASP27     | 3.64005 | Hydrogen Bond | Carbon Hydrogen Bond       | 544.97 | -7.9 |  |
| ALA7      | 3.48216 |               |                            |        |      |  |
| GLY15     | 3.50798 |               |                            |        |      |  |
| GLU17     | 4.88488 | Electrostatic | Pi-Anion                   |        |      |  |
| LEU28     | 3.7657  | Hydrophobic   | Pi-Sigma                   |        |      |  |
| MET20     | 5.71901 | Other         | Pi-Sulfur                  |        |      |  |
| MET20     | 5.75583 |               |                            |        |      |  |
| PHE31     | 4.72955 | Hydrophobic   | Pi-Pi T-shaped             |        |      |  |
| LEU28     | 5.34773 |               | Alkyl                      |        |      |  |
| ILE50     | 5.22702 |               |                            |        |      |  |
| LEU28     | 5.4916  |               | Pi-Alkyl                   |        |      |  |

|           |         |               |                            |        |      |  |
|-----------|---------|---------------|----------------------------|--------|------|--|
| ILE5      | 5.16431 |               |                            |        |      |  |
| ALA7      | 4.16746 |               |                            |        |      |  |
| 37        |         |               |                            |        |      |  |
| ALA7      | 2.56058 | Hydrogen Bond | Conventional Hydrogen Bond | 605.87 | -8.7 |  |
| ASP27     | 3.62684 |               | Carbon Hydrogen Bond       |        |      |  |
| TYR100    | 5.20995 | Hydrophobic   | Pi-Pi T-shaped             |        |      |  |
| ILE50     | 5.0427  |               | Alkyl                      |        |      |  |
| MET20     | 4.83558 |               | Pi-Alkyl                   |        |      |  |
| MET20     | 4.53183 |               |                            |        |      |  |
| LEU28     | 5.48553 |               |                            |        |      |  |
| ILE14     | 4.73176 |               |                            |        |      |  |
| 38        |         |               |                            |        |      |  |
| GLU17     | 4.78972 | Electrostatic | Attractive Charge          | 705.74 | -9   |  |
| ILE94     | 2.50758 | Hydrogen Bond | Conventional Hydrogen Bond |        |      |  |
| LEU28     | 3.94835 | Hydrophobic   | Pi-Sigma                   |        |      |  |
| MET20     | 5.89342 | Other         | Pi-Sulfur                  |        |      |  |
| PHE31     | 5.00102 | Hydrophobic   | Pi-Pi T-shaped             |        |      |  |
| ALA6:ALA7 | 4.55365 |               | Amide-Pi Stacked           |        |      |  |
| ILE5      | 4.83846 |               | Alkyl                      |        |      |  |
| ALA7      | 3.94521 |               |                            |        |      |  |
| MET20     | 5.46796 |               | Pi-Alkyl                   |        |      |  |
| ALA7      | 4.74961 |               |                            |        |      |  |
| LEU28     | 5.15282 |               |                            |        |      |  |
| MET20     | 4.85642 |               |                            |        |      |  |
| PHE31     | 5.29782 |               |                            |        |      |  |
| 39        |         |               |                            |        |      |  |
| ARG57     | 2.58638 | Hydrogen Bond | Conventional Hydrogen Bond | 937.76 | -8.3 |  |
| ARG57     | 2.18282 |               |                            |        |      |  |
| PHE31     | 4.7992  | Hydrophobic   | Pi-Pi T-shaped             |        |      |  |
| MET20     | 5.18068 |               | Alkyl                      |        |      |  |
| ILE5      | 4.84697 |               |                            |        |      |  |
| ALA7      | 4.48924 |               |                            |        |      |  |
| MET20     | 5.37667 |               | Pi-Alkyl                   |        |      |  |
| ILE5      | 5.45489 |               |                            |        |      |  |
| ALA7      | 4.556   |               |                            |        |      |  |
| LEU28     | 5.02873 |               |                            |        |      |  |
| LEU54     | 5.45716 |               |                            |        |      |  |
| TRP30     | 5.46865 |               |                            |        |      |  |
| PHE31     | 5.01022 |               |                            |        |      |  |

| 40     |         |                          |                                                        |        |      |
|--------|---------|--------------------------|--------------------------------------------------------|--------|------|
| GLU17  | 5.19129 | Electrostatic            | Attractive Charge                                      | 622.83 | -7.1 |
| SER49  | 3.54558 | Hydrogen Bond            | Carbon<br>Hydrogen Bond                                |        |      |
|        | 4.54671 | Hydrophobic              | Pi-Pi Stacked                                          |        |      |
| PHE31  | 5.46322 |                          |                                                        |        |      |
|        | 3.75304 |                          |                                                        |        |      |
| PHE31  | 4.10963 |                          |                                                        |        |      |
| LEU28  | 5.15441 |                          | Pi-Alkyl                                               |        |      |
| ILE50  | 5.32509 |                          |                                                        |        |      |
| ILE50  | 5.13593 |                          |                                                        |        |      |
| MET20  | 5.13796 |                          |                                                        |        |      |
| 41     |         |                          |                                                        |        |      |
| THR113 | 2.73475 | Hydrogen<br>Bond;Halogen | Conventional<br>Hydrogen<br>Bond;Halogen<br>(Fluorine) | 596.44 | -9   |
| TRP30  | 3.57593 | Hydrogen Bond            | Carbon<br>Hydrogen Bond                                |        |      |
| ILE5   | 3.54683 | Halogen                  | Halogen<br>(Fluorine)                                  |        |      |
| ALA6   | 3.42515 |                          |                                                        |        |      |
| ALA6   | 3.17175 |                          |                                                        |        |      |
| ASP27  | 3.59013 |                          |                                                        |        |      |
| ASP27  | 2.97815 |                          |                                                        |        |      |
| ASP27  | 3.08315 |                          |                                                        |        |      |
| ASP27  | 3.22541 |                          |                                                        |        |      |
| LEU28: | 3.98408 | Hydrophobic              | Pi-Sigma                                               |        |      |
| LYS32  | 3.49227 |                          | Alkyl                                                  |        |      |
| ILE5   | 4.58651 |                          |                                                        |        |      |
| ALA7   | 4.22775 |                          |                                                        |        |      |
| LEU28  | 4.3502  |                          | Pi-Alkyl                                               |        |      |
| ALA7   | 4.17323 |                          |                                                        |        |      |
| PHE31  | 4.91107 |                          |                                                        |        |      |
| PHE31  | 5.25311 |                          |                                                        |        |      |

Figure S1. Mass Spectrum of Synthesized Compound 27

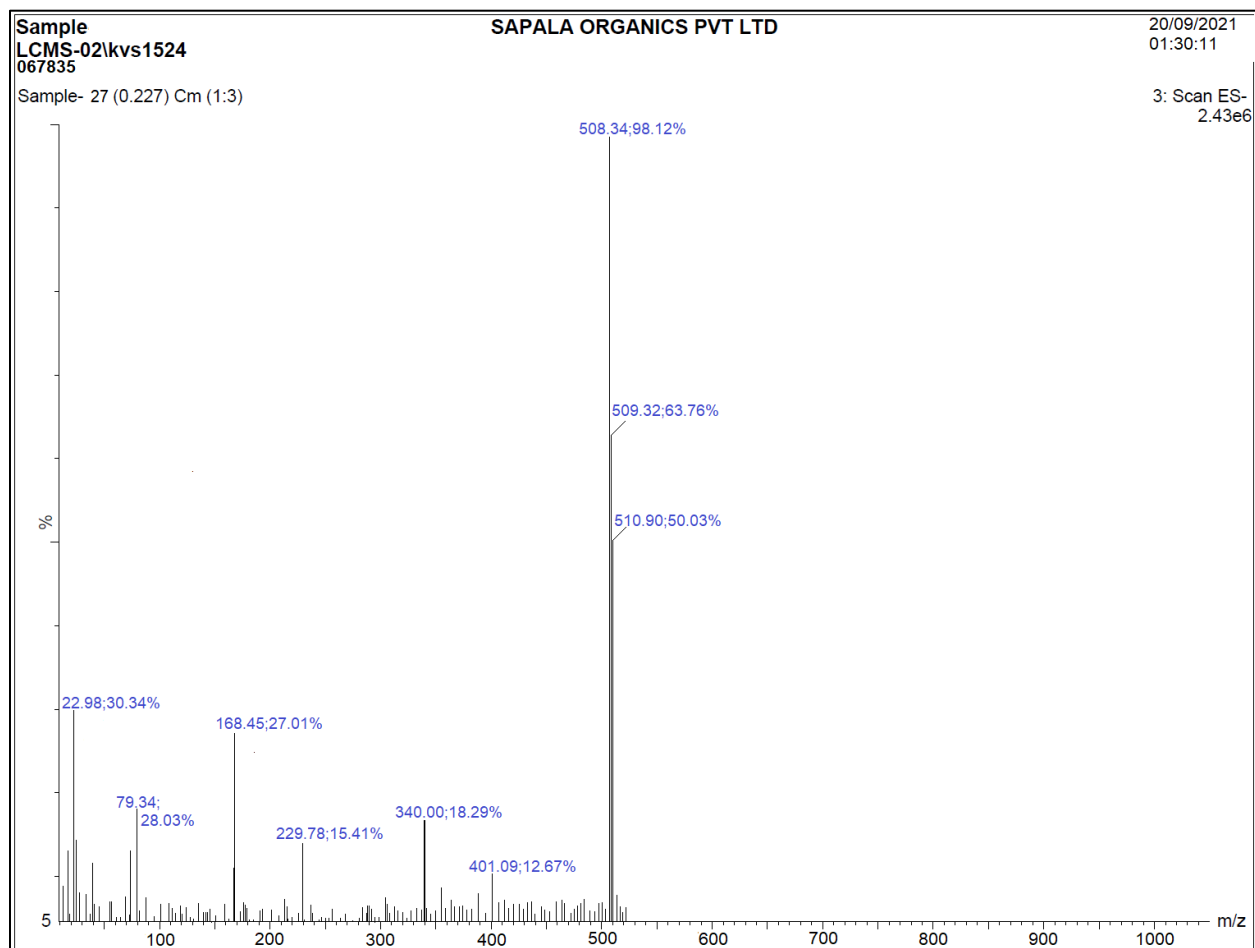

Methyl 2-((6-chloro-1H-benzo[d]imidazol-2-yl)methylthio)-4-(4-bromophenyl)-1,2,3,4-tetrahydro-6-methylpyrimidine-5-carboxylate (**27**)



Figure S2. Mass Spectrum of Synthesized Compound 29

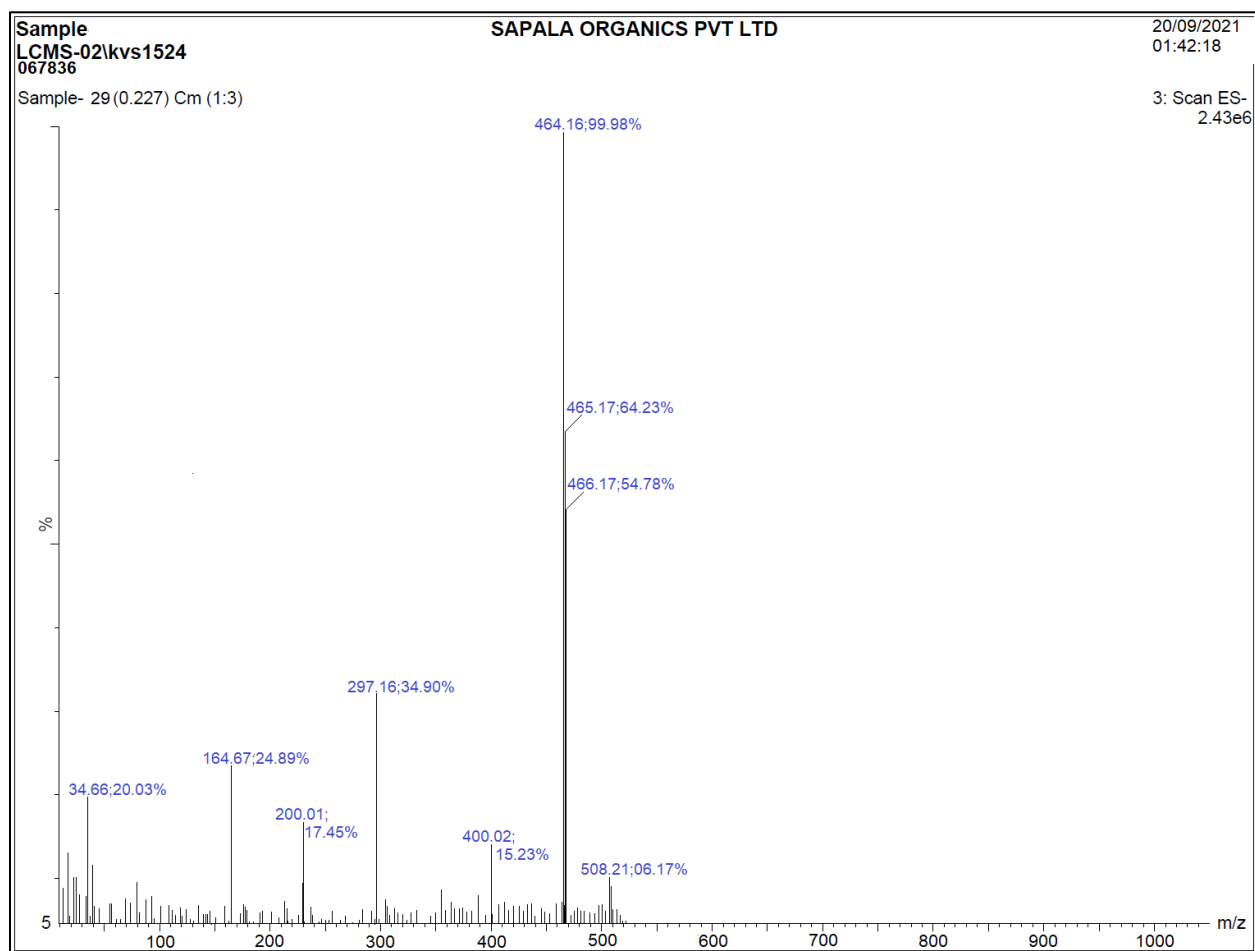

*Methyl 2-((6-chloro-1H-benzo[d]imidazol-2-yl) methylthio)-4-(4-chlorophenyl)-1, 2, 3, 4-tetrahydro-6-methylpyrimidine-5-carboxylate (29)*

Figure S3. Mass Spectrum of Synthesized Compound 30

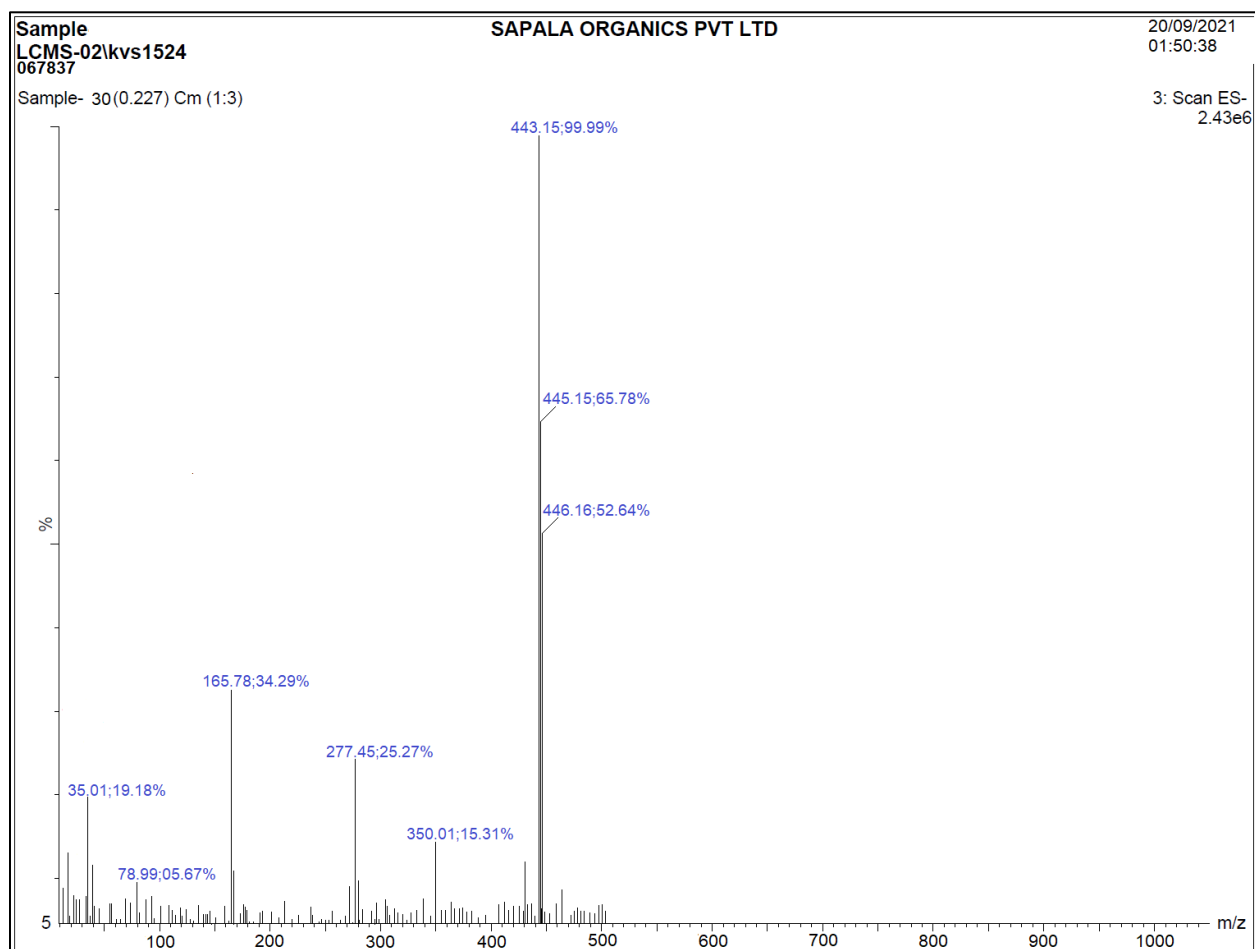

*Methyl 2-((6-chloro-1H-benzo[d]imidazol-2-yl)methylthio)-1,2,3,4-tetrahydro-6-methyl-4-p-tolylpyrimidine-5-carboxylate (30)*

Figure S4. Mass Spectrum of Synthesized Compound 33

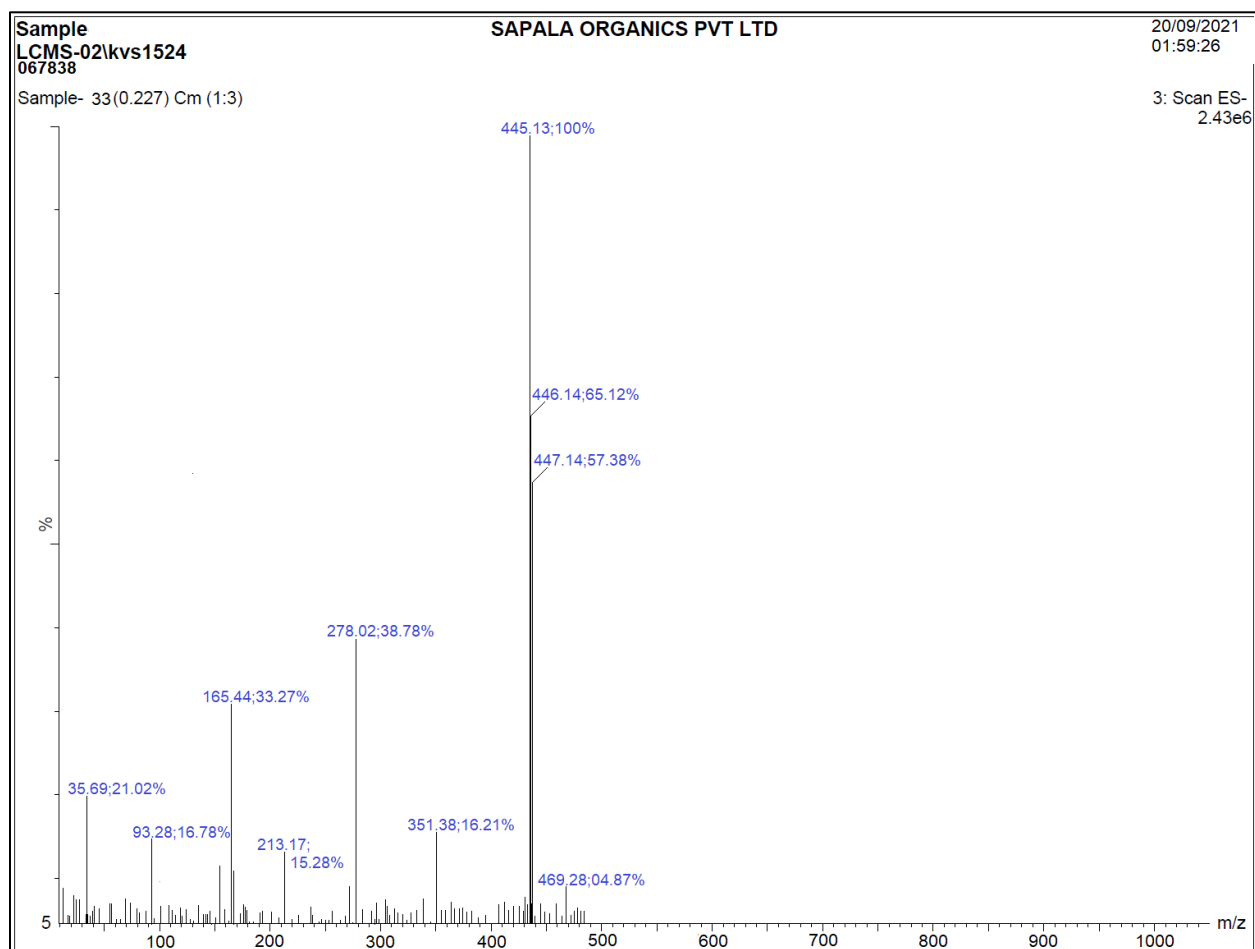

*Methyl 2-((6-chloro-1H-benzo[d]imidazol-2-yl)methylthio)-1,2,3,4-tetrahydro-4-(3-hydroxyphenyl)-6-methylpyrimidine-5-carboxylate (33)*

Figure S5. Mass Spectrum of Synthesized Compound 37

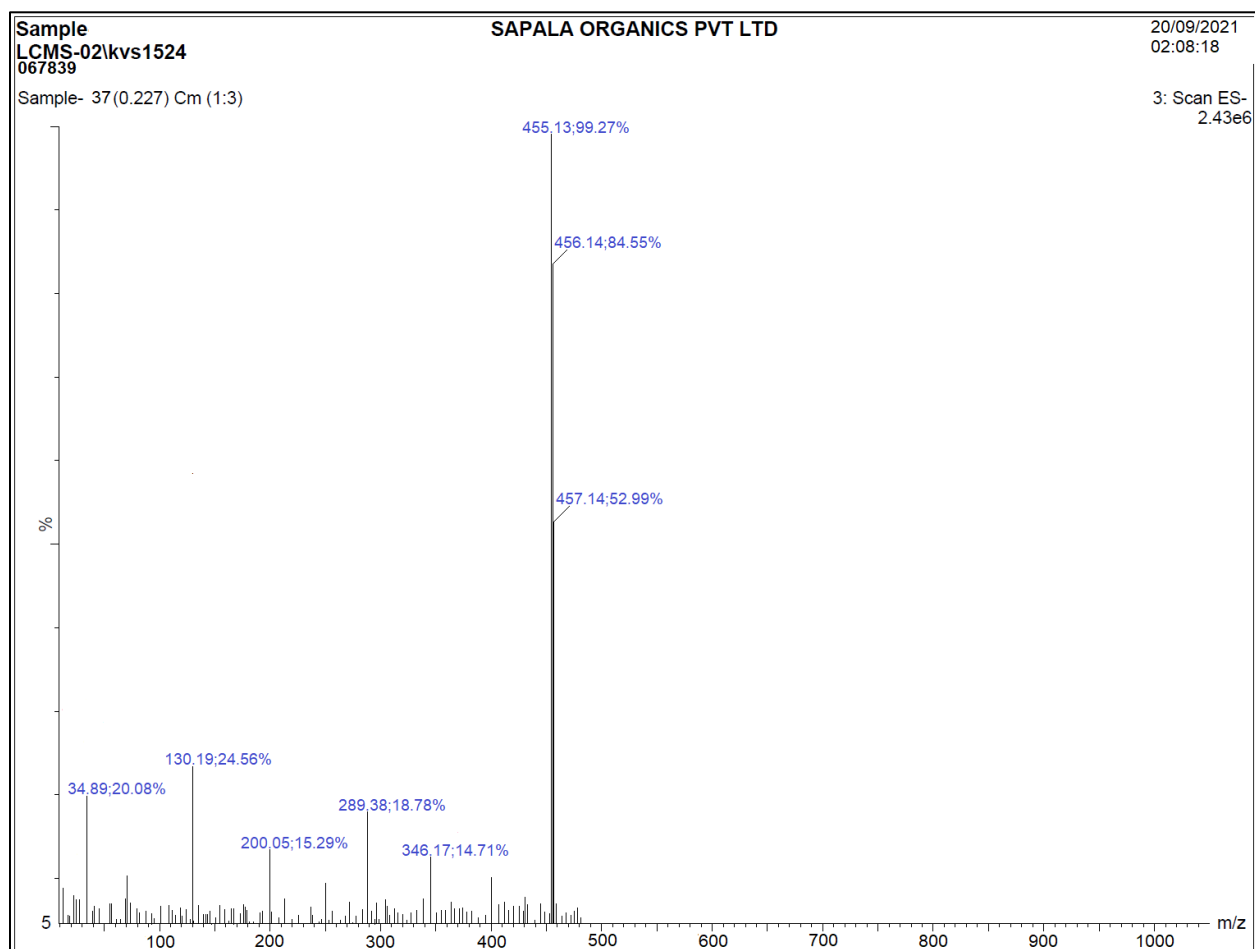

Methyl 2-((6-chloro-1H-benzo[d]imidazol-2-yl)methylthio)-1,2,3,4-tetrahydro-6-methyl-4-styrylpyrimidine-5-carboxylate (**37**)

Figure S6. Mass Spectrum of Synthesized Compound 38

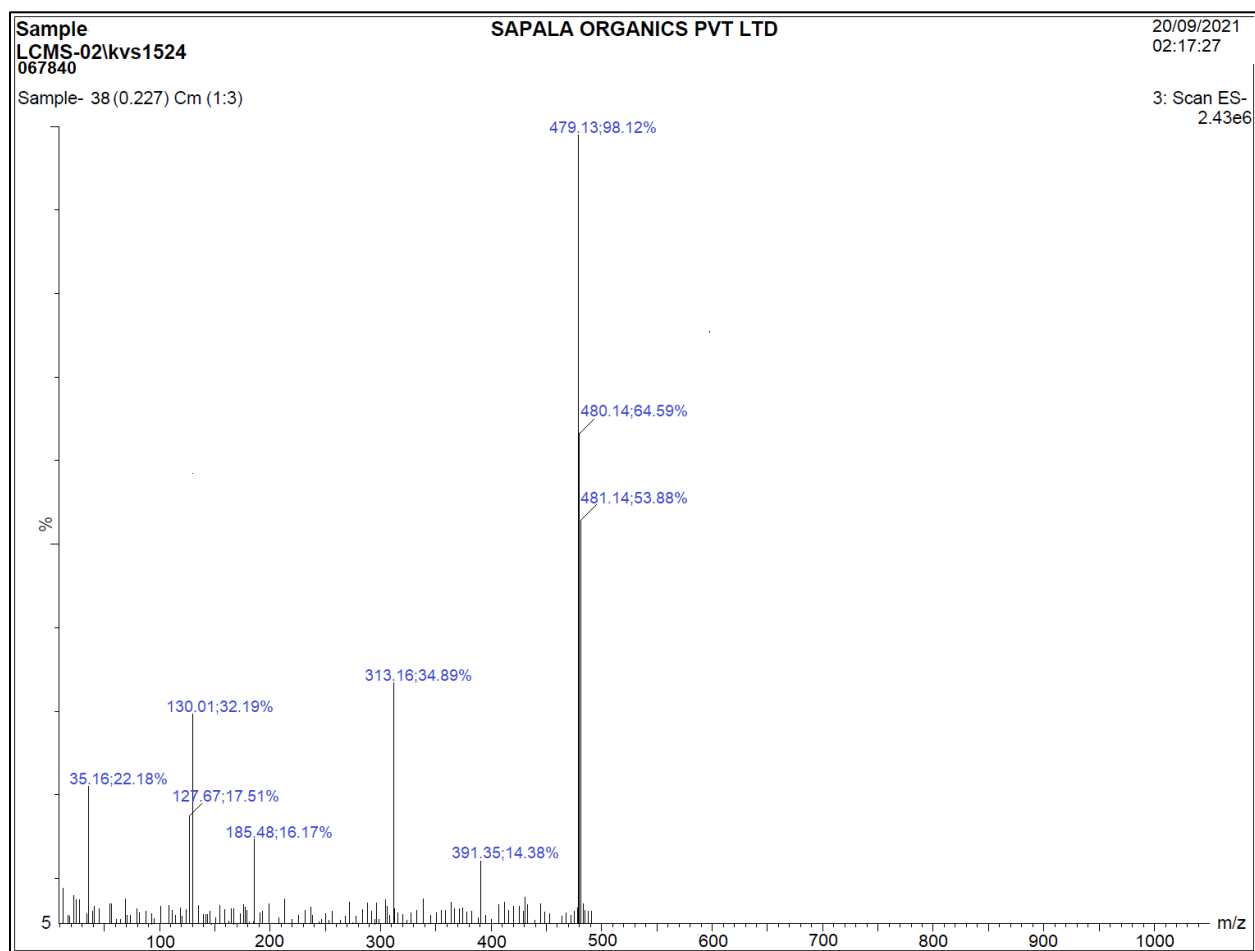

*Methyl 2-((6-chloro-1H-benzo[d]imidazol-2-yl)methylthio)-1,2,3,4-tetrahydro-6-methyl-4-(naphthalen-1-yl)pyrimidine-5-carboxylate (38)*

Figure S7. Mass Spectrum of Synthesized Compound 41

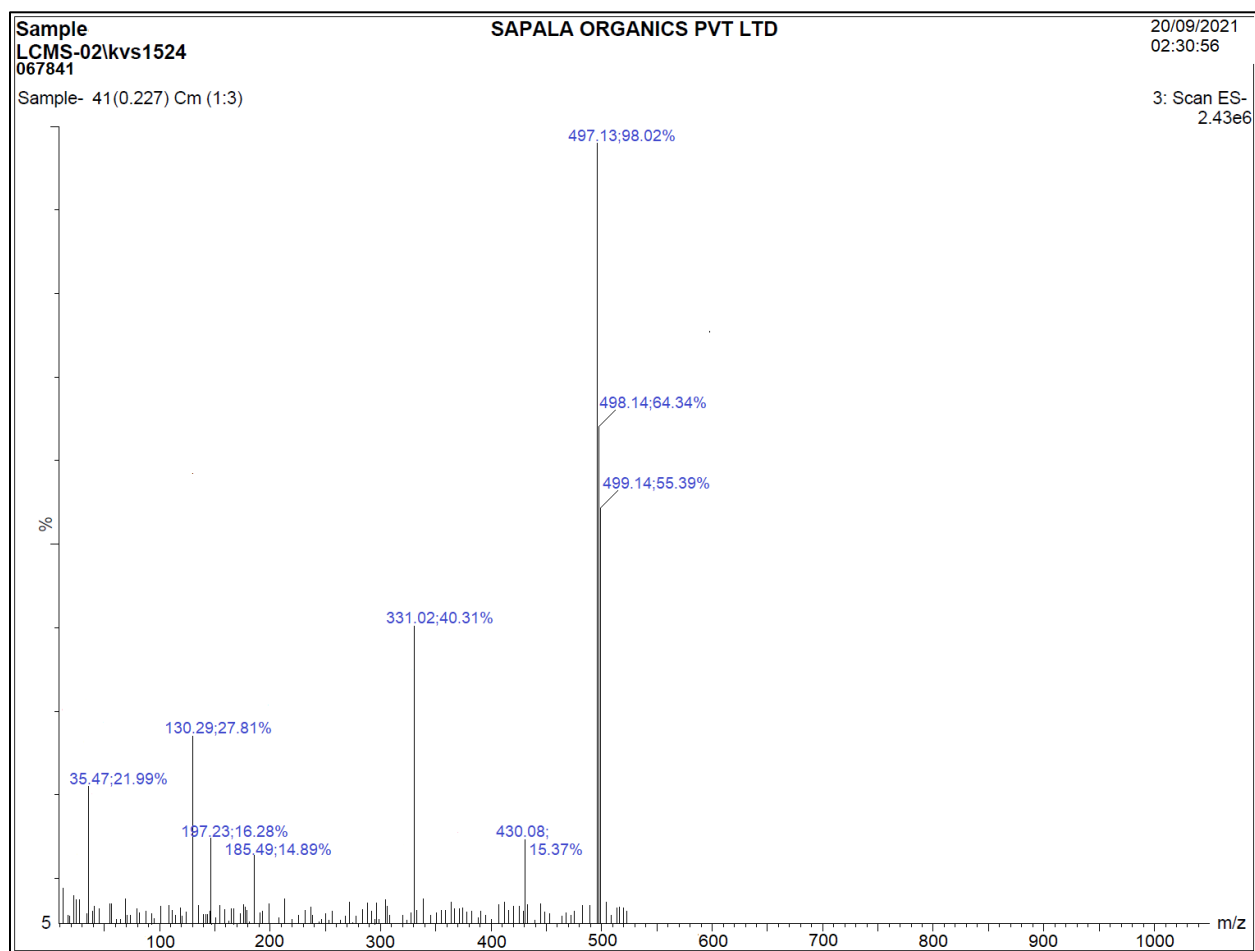

*Methyl 2-((6-chloro-1H-benzo[d]imidazol-2-yl)methylthio)-4-(4-(trifluoromethyl)phenyl)-1,2,3,4-tetrahydro-6-methylpyrimidine-5-carboxylate (41)*
